# Supplementary material
Source: publisher site journal article supplement (https://kjim.org/upload/media/kjim-2024-364-Supplementary-Table-3.pdf)
Supplement: Supplementary file 1 [file kjim-2024-364-Supplementary-Table-3.pdf]

**Supplementary Table 3. Independent predictors for ventricular arrhythmia in patients who received ILR implantation for unexplained syncope**

| Variable                                            | Univariate analysis  |                | Multivariate analysis <sup>a)</sup> |                |
|-----------------------------------------------------|----------------------|----------------|-------------------------------------|----------------|
|                                                     | HR (95% CI)          | <i>p</i> value | HR (95% CI)                         | <i>p</i> value |
| Age                                                 | 0.990 (0.953–1.027)  | 0.585          | 0.968 (0.914–1.025)                 | 0.265          |
| Sex, male                                           | 0.664 (0.166–2.657)  | 0.563          | 1.401 (0.288–6.820)                 | 0.676          |
| Diabetes mellitus                                   | 0.592 (0.074–4.745)  | 0.622          | 1.084 (0.111–10.599)                | 0.945          |
| Hypertension                                        | 0.161 (0.020–1.288)  | 0.085          | 0.218 (0.025–1.920)                 | 0.170          |
| Structural heart disease <sup>b)</sup>              | 1.552 (0.388–6.207)  | 0.534          | 1.473 (0.256–8.477)                 | 0.665          |
| Any intraventricular conduction delay <sup>c)</sup> | 1.458 (0.181–11.720) | 0.723          | 1.348 (0.133–13.684)                | 0.801          |
| LAVI $\geq$ 34 mL/m <sup>2</sup>                    | 3.548 (0.687–18.320) | 0.131          | 5.186 (0.708–37.998)                | 0.105          |

ILR, implantable loop recorder; HR, hazard ratio; CI, confidence interval; LAVI, left atrial volume index; ICMP, ischemic cardiomyopathy; DCMP, dilated cardiomyopathy; HCMP, hypertrophic cardiomyopathy; RBBB, right bundle branch block; LBBB, left bundle branch block; LAFB, left anterior fascicular block; LPFB, left posterior fascicular block.

<sup>a)</sup>The discriminant ability of multivariable model was 0.788 (95% CI 0.604–0.973). All variables in Supplementary Table 3 were used for adjustment.

<sup>b)</sup>Structural heart disease included coronary artery disease, ICMP, DCMP, HCMP, other congestive heart failure, and moderate to severe valvular heart disease.

<sup>c)</sup>Any intraventricular conduction delay included RBBB, LBBB, LAFB, LPFB, and bifascicular block.
